# Supplementary material
Source: ML conference proceedings conference paper supplement (https://openaccess.thecvf.com/content/CVPR2025/html/Wu_Sparse2DGS_Geometry-Prioritized_Gaussian_CVPR_2025_paper.html)
Supplement: Supplementary file 1 [file Wu_Sparse2DGS_Geometry-Prioritized_Gaussian_CVPR_2025_supplemental.pdf]

# Supplementary Material for Sparse2DGS: Geometry-Prioritized Gaussian Splatting for Surface Reconstruction from Sparse Views

Jiang Wu Rui Li Yu Zhu<sup>†</sup> Rong Guo Jinqiu Sun Yanning Zhang<sup>†</sup>  
Northwestern Polytechnical University

## A. Ablation Study on MVS Feature Splatting

We leverage MVS feature splatting for geometry-enhanced supervision (Sec. 3.2). As the adopted CLMVSNet [8] extracts feature maps at 3 different scales through an FPN, we analyze the impact of each feature scale on reconstruction quality. As shown in Tab. 1, high-resolution feature maps provide finer-grained geometric constraints, leading to better performance (row **a** to row **c**). Moreover, we set the feature vector of each Gaussian primitive as learnable parameters. As shown in Tab. 1 (row **d**), the coupled learning of feature and geometry degraded the final performance, validating the necessity of fixing feature values for geometric optimization.

|     | Feature Res.     | Fixed | Accuracy↓    | Completion↓  | Average↓     |
|-----|------------------|-------|--------------|--------------|--------------|
| (a) | $H/4 \times W/4$ | ✓     | 0.853        | 1.645        | 1.248        |
| (b) | $H/2 \times W/2$ | ✓     | 0.835        | 1.651        | 1.243        |
| (c) | $H \times W$     | ✓     | <b>0.816</b> | <b>1.632</b> | <b>1.224</b> |
| (d) | $H \times W$     | ✗     | 0.830        | 1.648        | 1.239        |

Table 1. Ablation study on feature splatting.

## B. Comparison of Different Gaussian Primitive Update Strategies

In addition to the generic density control strategy used in 3D Gaussian Splatting [5], GaussianPro [2] employs traditional MVS to optimize rendered depth maps and projects geometrically consistent depths into a point cloud, which is used to expand the Gaussian primitives. As shown in Tab. 2, we compared this strategy with our proposed Selective Gaussian Update strategy (Sec. 3.4). The traditional MVS optimization strategy of GaussianPro does not show significant advantages with the MVS-initialized point cloud. Our Selective Gaussian Update strategy leverages rendered geometry to refine Gaussian primitives, achieving better results.

<sup>†</sup> indicates corresponding authors.

| Methods                   | Accuracy↓    | Completeness↓ | Average↓     |
|---------------------------|--------------|---------------|--------------|
| Baseline                  | 0.790        | 1.612         | 1.201        |
| GaussianPro [2]           | 0.791        | 1.598         | 1.194        |
| Selective Gaussian Update | <b>0.760</b> | <b>1.544</b>  | <b>1.152</b> |

Table 2. Quantitative results of different Gaussian primitive update strategies.

## C. Comparison of Surface Reconstruction and Novel View Synthesis

We compare the surface reconstruction and novel view synthesis results of different methods on the DTU dataset. We follow the dataset split strategy of SparseNeuS [7], selecting views 23, 24, and 33 for training. The recent Gaussian-based state-of-the-art NVS method, DNGaussian [6], employs monocular depth for regularization. Although it achieves reliable novel view synthesis under sparse views, the reconstructed surface exhibits noise and missing regions (Fig 1). As shown in Table 3, our method achieves the best LPIPS and SSIM scores for novel view synthesis. Moreover, it demonstrates superior surface reconstruction accuracy and completeness compared to all other methods.

|     | Settings               | Accuracy↓   | Completion↓ | Average↓    |
|-----|------------------------|-------------|-------------|-------------|
| (a) | CLMVSNet [8]           | 0.82        | 1.70        | 1.26        |
| (b) | CLMVSNet [8] + Ours    | 0.74        | 1.52        | 1.13        |
| (c) | TransMVSNet [3]        | <b>0.61</b> | 1.60        | 1.11        |
| (d) | TransMVSNet [3] + Ours | 0.63        | <b>1.43</b> | <b>1.03</b> |

Table 4. Improvement upon different MVS methods.

## D. Experiment on Different MVS Methods

As shown in Tab. 4, we compare the reconstruction performance of different MVS methods combined with Sparse2DGS. TransMVSNet [3] (row **c**) is trained on the DTU dataset using ground truth depth, achieving superior reconstruction performance compared to the unsupervised CLMVSNet [8] (row **a**). By initializing the Gaussians with CLMVSNet and performing test-time fine-tuning, we achieve performance comparable to that of TransMVSNet

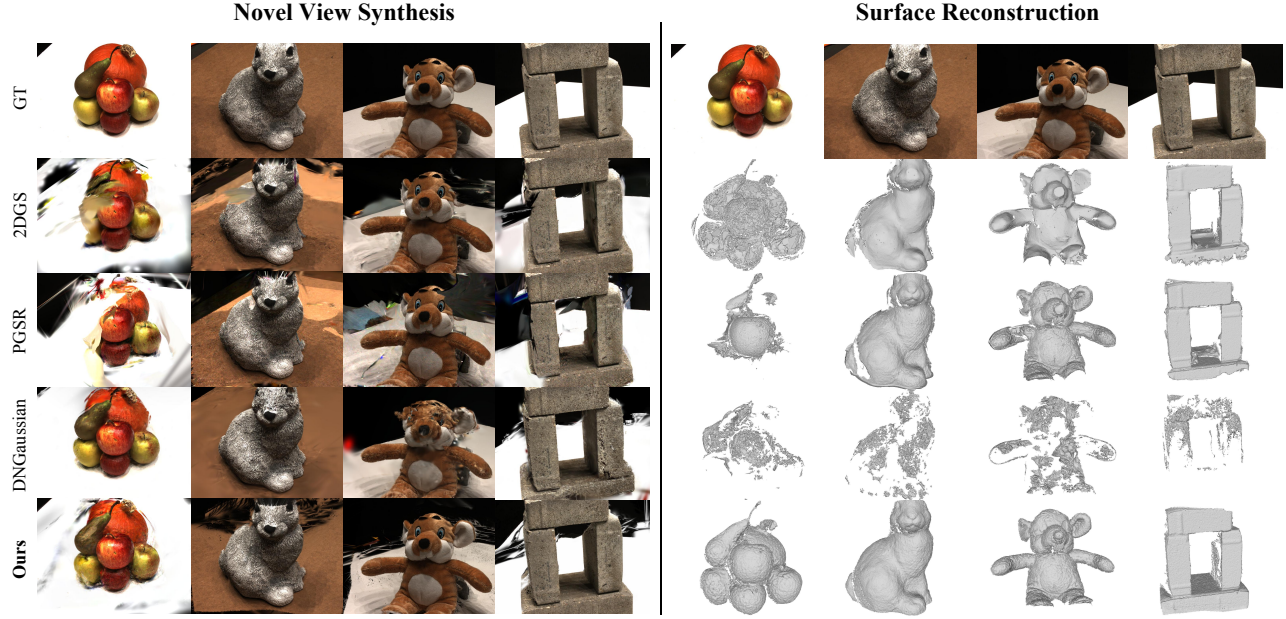

Figure 1. Visualization of surface reconstruction and novel view synthesis results.

| Methods        | PSNR $\uparrow$ | SSIM $\uparrow$ | LPIPS $\downarrow$ | Accuracy $\downarrow$ | Completion $\downarrow$ | Average $\downarrow$ |
|----------------|-----------------|-----------------|--------------------|-----------------------|-------------------------|----------------------|
| 2DGS [4]       | 16.55           | 0.601           | 0.385              | 2.17                  | 3.45                    | 2.81                 |
| GOF [9]        | 16.67           | 0.575           | 0.388              | 3.09                  | 2.55                    | 2.82                 |
| PGSR [1]       | 15.30           | 0.536           | 0.409              | 1.64                  | 2.52                    | 2.08                 |
| DNGaussian [6] | <b>19.09</b>    | 0.664           | 0.390              | 4.22                  | 7.15                    | 5.68                 |
| Ours           | 17.49           | <b>0.726</b>    | <b>0.275</b>       | <b>0.74</b>           | <b>1.52</b>             | <b>1.13</b>          |

Table 3. Quantitative comparison of surface reconstruction and novel view synthesis from sparse views.

(row **b**). Additionally, initializing with the point cloud from TransMVSNet leads to improved performance, further demonstrating the effectiveness of our method (row **d**).

## References

- [1] Danpeng Chen, Hai Li, Weicai Ye, Yifan Wang, Weijian Xie, Shangjin Zhai, Nan Wang, Haomin Liu, Hujun Bao, and Guofeng Zhang. Pgsr: Planar-based gaussian splatting for efficient and high-fidelity surface reconstruction. *arXiv preprint arXiv:2406.06521*, 2024. 2
- [2] Kai Cheng, Xiaoxiao Long, Kaizhi Yang, Yao Yao, Wei Yin, Yuexin Ma, Wenping Wang, and Xuejin Chen. Gaussianpro: 3d gaussian splatting with progressive propagation. In *Forty-first International Conference on Machine Learning*, 2024. 1
- [3] Yikang Ding, Wentao Yuan, Qingtian Zhu, Haotian Zhang, Xiangyue Liu, Yuanjiang Wang, and Xiao Liu. Transmvsnet: Global context-aware multi-view stereo network with transformers. In *Proceedings of the IEEE/CVF Conference on Computer Vision and Pattern Recognition*, pages 8585–8594, 2022. 1
- [4] Binbin Huang, Zehao Yu, Anpei Chen, Andreas Geiger, and Shenghua Gao. 2d gaussian splatting for geometrically accurate radiance fields. In *ACM SIGGRAPH 2024 Conference Papers*, pages 1–11, 2024. 2
- [5] Bernhard Kerbl, Georgios Kopanas, Thomas Leimkühler, and George Drettakis. 3d gaussian splatting for real-time radiance field rendering. *ACM Trans. Graph.*, 42(4):139–1, 2023. 1
- [6] Jiahe Li, Jiawei Zhang, Xiao Bai, Jin Zheng, Xin Ning, Jun Zhou, and Lin Gu. Dngaussian: Optimizing sparse-view 3d gaussian radiance fields with global-local depth normalization. In *Proceedings of the IEEE/CVF Conference on Computer Vision and Pattern Recognition*, pages 20775–20785, 2024. 1, 2
- [7] Xiaoxiao Long, Cheng Lin, Peng Wang, Taku Komura, and Wenping Wang. Sparseneus: Fast generalizable neural surface reconstruction from sparse views. In *European Conference on Computer Vision*, pages 210–227. Springer, 2022. 1
- [8] Kaiqiang Xiong, Rui Peng, Zhe Zhang, Tianxing Feng, Jianbo Jiao, Feng Gao, and Ronggang Wang. Cl-mvsnet: Unsupervised multi-view stereo with dual-level contrastive learning. In *Proceedings of the IEEE/CVF International Conference on Computer Vision*, pages 3769–3780, 2023. 1
- [9] Zehao Yu, Torsten Sattler, and Andreas Geiger. Gaussian opacity fields: Efficient and compact surface reconstruction in unbounded scenes. *arXiv preprint arXiv:2404.10772*, 2024. 2
